# Supplementary material for: Increased Risk of Cutaneous and Systemic Infections in Atopic Dermatitis—A Cohort Study
Source: PubMed Central journal article supplement (PMC5660507; doi:10.1016/j.jid.2017.01.030), 2017-06
Supplement: mmc1.pdf [file mmc1.pdf]

## SUPPLEMENTARY MATERIAL

Supplementary Table S1. Codes for exposure and outcomes

| AD      | Dermatitis | Cutaneous warts | Streptococcal throat infections | Pneumonia | Impetigo | Herpes simplex virus | Molluscum contagiosum | Allergic rhinitis | Otitis media | Asthma  | Dermatophyte infections |
|---------|------------|-----------------|---------------------------------|-----------|----------|----------------------|-----------------------|-------------------|--------------|---------|-------------------------|
| M114.00 | Myu2.00    | 7G09111         | A340.00                         | 4JUK.00   | M05z.00  | Q402000              | 43jb.00               | 14B1.00           | F501G00      | 12D2.00 | AB04.00                 |
| M113.00 | Myu2200    | A781400         | A34..00                         | A022200   |          | A54y.00              | A780.00               | 1C83.13           | F512100      | 14B4.00 | AB04.12                 |
| M112.00 | M114.00    | A781.11         | A340z00                         | A116.00   |          | A544500              | A780000               | H00..16           | F501C00      | 173A.00 |                         |
| M111.00 | M11..00    | A781.00         | A34z.00                         | A380300   |          | A531z00              |                       | H120.00           | F514000      | 173c.00 |                         |
| M12z100 | M11z.00    | A781600         | A340300                         | A3B2.00   |          | 9kF8.00              |                       | H120000           | F501D00      | 178..00 |                         |
|         | M111.00    | 7G09011         | A3B0.00                         | A3BXA00   |          | A53y.00              |                       | H120100           | F501411      | 1781    |                         |
|         | M119.00    | A781000         | A340100                         | A3BxB00   |          | A54x.00              |                       | H120200           | F502300      | 1782    |                         |
|         | M12z111    | ZA3..00         | A340200                         | A3C0300   |          | A531000              |                       | H120300           | F513111      | 1783    |                         |
|         | A540.00    | 8BAZ.11         |                                 | A54x400   |          | A532000              |                       | H120z00           | F514300      | 1784    |                         |
|         | M12z100    | 7G06111         |                                 | A551.00   |          | A544100              |                       | H17..00           | F502500      | 1785    |                         |
|         | F502411    |                 |                                 | A730.00   |          | A53x.00              |                       | H17..11           | F510300      | 1786    |                         |
|         | F4D3000    |                 |                                 | AB24.11   |          | A53xz00              |                       | H170.00           | F501B00      | 1787    |                         |
|         | M12z400    |                 |                                 | H06z100   |          | A532z00              |                       | H170.11           | F513000      | 1788    |                         |
|         | 12H1.00    |                 |                                 | H06z112   |          | A532100              |                       | H171.00           | F513100      | 1789    |                         |
|         | M113.00    |                 |                                 | H2...00   |          | A544z00              |                       | H171.14           | F501y00      | 178A.00 |                         |
|         | 14F1.00    |                 |                                 | H20..00   |          | F030411              |                       | H172.00           | F512z00      | 178B.00 |                         |
|         | M12z300    |                 |                                 | H20..11   |          | A544000              |                       | H172.11           | F522.00      | 1J70.00 |                         |
|         | M112.00    |                 |                                 | H200.00   |          | A541400              |                       | H17z.00           | F501E00      | 1O2..00 |                         |
|         | M12z200    |                 |                                 | H201.00   |          | A531100              |                       | H330.13           | F511100      | 2126200 |                         |
|         | M102.00    |                 |                                 | H202.00   |          | A54x300              |                       | H330011           | F502600      | 212G.00 |                         |
|         | M07y.11    |                 |                                 | H20y.00   |          | A546.00              |                       | Hyu2000           | F513z00      | 38DL.00 |                         |
|         | M102.11    |                 |                                 | H20z.00   |          | 65PQ.00              |                       |                   | F510200      | 663..11 |                         |
|         | M101.12    |                 |                                 | H21..00   |          | A541z00              |                       |                   | F511300      | 663e.00 |                         |
|         |            |                 |                                 | H21..11   |          | 9kF8.11              |                       |                   | F513.00      | 663f.00 |                         |
|         |            |                 |                                 | H22..00   |          | A53x000              |                       |                   | F514.00      | 663N100 |                         |
|         |            |                 |                                 | H22..11   |          | A544300              |                       |                   | F524000      | 663N200 |                         |
|         |            |                 |                                 | H220.00   |          | A532300              |                       |                   | F501z00      | 663O.00 |                         |
|         |            |                 |                                 | H221.00   |          | A541500              |                       |                   | F511200      | 663O000 |                         |

|         |         |         |         |
|---------|---------|---------|---------|
| H222.00 | A548.00 | F520100 | 663p.00 |
| H222.11 | A541000 | F511.11 | 663P.00 |
| H223.00 | A54z.00 | F521.00 | 663r.00 |
| H223000 | A544.00 | F524.00 | 663t.00 |
| H224.00 | 2524.00 | F511z00 | 663v.00 |
| H22y.00 | A544200 | F520000 | 663V100 |
| H22y000 | A54..11 | F518.00 | 663V300 |
| H22y011 | 2524.12 | F502400 | 663w.00 |
| H22y200 | A54z.11 | F520z00 | 663W.00 |
| H22yX00 | A541.00 | F514z00 | 663x.00 |
| H22yz00 | A54..00 | F512000 | 66Y5.00 |
| H22z.00 | A542.11 | F510000 | 663h.00 |
| H23..00 |         | F512.00 | 663j.00 |
| H23..11 |         | F510z00 | 663m.00 |
| H231.00 |         | F525.00 | 663n.00 |
| H232.00 |         | F514100 | 663N.00 |
| H233.00 |         | F510011 | 663N000 |
| H23z.00 |         | F502700 | 663Q.00 |
| H24..00 |         | F511.00 | 663s.00 |
| H240.00 |         | F501100 | 663U.00 |
| H241.00 |         | F510100 | 663u.00 |
| H242.00 |         | F501F00 | 663V.00 |
| H243.00 |         | F514200 | 663V000 |
| H243.11 |         | F523.00 | 663V200 |
| H246.00 |         | F501000 | 663y.00 |
| H247000 |         | F512.12 | 66Y9.00 |
| H247z00 |         | F528.00 | 66YA.00 |
| H24y.00 |         | F520.00 | 66YC.00 |
| H24y000 |         | F512.11 | 66YE.00 |
| H24y200 |         | F52z.11 | 66YJ.00 |
| H24y300 |         | F526.00 | 66YK.00 |
| H24y400 |         | F527.00 | 66YP.00 |

|         |         |         |
|---------|---------|---------|
| H24y600 | F502.00 | 66Yp.00 |
| H24y700 | F52..00 | 66YQ.00 |
| H24yz00 | F510.00 | 66Yq.00 |
| H24z.00 | F502z00 | 66Yr.00 |
| H25..00 | F501.00 | 679J.00 |
| H25..11 | F52z.00 | 66YR.00 |
| H26..00 | F510500 | 66Ys.00 |
| H260.00 |         | 68C3.00 |
| H261.00 |         | 8CMA000 |
| H262.00 |         | 8CR0.00 |
| H270.00 |         | 8H2P.00 |
| H270.11 |         | 8791    |
| H270000 |         | 8793    |
| H270100 |         | 8794    |
| H270z00 |         | 8795    |
| H28..00 |         | 8796    |
| H2B..00 |         | 8797    |
| H2C..00 |         | 8798    |
| H2y..00 |         | 8HTT.00 |
| H2z..00 |         | 9N1d.00 |
| H470.11 |         | 9NNX.00 |
| H470312 |         | 9OJ..00 |
| H471000 |         | 9OJ..11 |
| H530300 |         | 9OJ1.00 |
| H540000 |         | 9OJ2.00 |
| H540100 |         | 9OJ3.00 |
| H564.00 |         | 9OJ4.00 |
| H564.11 |         | 9OJ5.00 |
| H56y000 |         | 9OJ6.00 |
| H56y100 |         | 9OJ7.00 |
| H571.00 |         | 9OJ8.00 |
| Hyu0800 |         | 9OJ9.00 |

|  |         |         |
|--|---------|---------|
|  | Hyu0A00 | 9QJA.00 |
|  | Hyu0B00 | 9QJA.11 |
|  | Hyu0D00 | 9QJZ.00 |
|  | SP13100 | 9Q21.00 |
